# Supplementary material for: Copy Number Variation among Resistance Genes Analogues in Brassica napus
Source: MDPI journal article supplement (doi:10.3390/genes13112037), 2022-11-04
Supplement: s1 [file s1]

**Table S1:** Chromosomal distribution of CNV events in eight *B. napus* lines.

| Lines              | Ascona    |           | English Giant |           | Hansen × Gaspard |           | Milena    |           | Pacific   |           | Pirola    |           | Tina       |           | Wilhelmsburger |           | Sum<br>Del | Sum Dup    | Total       |
|--------------------|-----------|-----------|---------------|-----------|------------------|-----------|-----------|-----------|-----------|-----------|-----------|-----------|------------|-----------|----------------|-----------|------------|------------|-------------|
| Chromosomes        | Del       | Dup       | Del           | Dup       | Del              | Dup       | Del       | Dup       | Del       | Dup       | Del       | Dup       | Del        | Dup       | Del            | Dup       |            |            |             |
| A01                | 0         | 0         | 3             | 2         | 2                | 3         | 2         | 5         | 2         | 2         | 1         | 1         | 5          | 3         | 6              | 7         | 21         | 23         | 44          |
| A02                | 3         | 4         | 3             | 1         | 2                | 0         | 9         | 0         | 3         | 2         | 4         | 3         | 10         | 8         | 12             | 0         | 46         | 18         | 64          |
| A03                | 0         | 1         | 6             | 0         | 2                | 4         | 1         | 3         | 2         | 3         | 2         | 12        | 2          | 5         | 4              | 12        | 19         | 40         | 59          |
| A04                | 1         | 1         | 2             | 1         | 1                | 1         | 1         | 1         | 1         | 3         | 1         | 1         | 4          | 2         | 2              | 0         | 13         | 10         | 23          |
| A05                | 0         | 1         | 3             | 1         | 1                | 1         | 1         | 0         | 0         | 0         | 2         | 0         | 9          | 0         | 5              | 1         | 21         | 4          | 25          |
| A06                | 3         | 4         | 9             | 25        | 1                | 2         | 6         | 3         | 2         | 3         | 7         | 1         | 3          | 5         | 3              | 4         | 34         | 47         | 81          |
| A07                | 4         | 1         | 8             | 1         | 1                | 0         | 3         | 1         | 3         | 1         | 2         | 0         | 7          | 1         | 5              | 0         | 33         | 5          | 38          |
| A08                | 4         | 3         | 5             | 1         | 2                | 3         | 8         | 3         | 9         | 3         | 7         | 2         | 8          | 2         | 7              | 2         | 50         | 19         | 69          |
| A09                | 3         | 0         | 8             | 17        | 10               | 1         | 6         | 1         | 5         | 16        | 7         | 2         | 15         | 24        | 19             | 21        | 73         | 82         | 155         |
| A10                | 2         | 0         | 0             | 0         | 0                | 0         | 1         | 0         | 1         | 1         | 1         | 0         | 0          | 1         | 2              | 1         | 7          | 3          | 10          |
| <b>Total</b>       | <b>20</b> | <b>15</b> | <b>47</b>     | <b>49</b> | <b>22</b>        | <b>15</b> | <b>38</b> | <b>17</b> | <b>28</b> | <b>34</b> | <b>34</b> | <b>22</b> | <b>63</b>  | <b>51</b> | <b>65</b>      | <b>48</b> | <b>317</b> | <b>251</b> | <b>568</b>  |
| C01                | 7         | 2         | 5             | 0         | 1                | 0         | 4         | 0         | 0         | 3         | 2         | 0         | 7          | 0         | 10             | 0         | 36         | 5          | 41          |
| C02                | 2         | 1         | 11            | 5         | 0                | 1         | 6         | 2         | 5         | 3         | 4         | 2         | 18         | 7         | 7              | 11        | 53         | 32         | 85          |
| C03                | 4         | 7         | 6             | 0         | 6                | 3         | 3         | 2         | 2         | 5         | 17        | 6         | 8          | 7         | 20             | 3         | 66         | 33         | 99          |
| C04                | 1         | 2         | 1             | 1         | 0                | 2         | 2         | 4         | 2         | 3         | 2         | 1         | 1          | 4         | 9              | 2         | 18         | 19         | 37          |
| C05                | 0         | 3         | 1             | 5         | 1                | 1         | 0         | 3         | 0         | 3         | 2         | 2         | 5          | 2         | 2              | 6         | 11         | 25         | 36          |
| C06                | 11        | 1         | 0             | 0         | 2                | 1         | 1         | 2         | 11        | 2         | 11        | 3         | 11         | 1         | 18             | 0         | 65         | 10         | 75          |
| C07                | 2         | 1         | 3             | 0         | 0                | 0         | 2         | 2         | 0         | 2         | 1         | 1         | 3          | 2         | 2              | 2         | 13         | 10         | 23          |
| C08                | 0         | 4         | 0             | 1         | 0                | 2         | 4         | 3         | 6         | 0         | 2         | 1         | 30         | 1         | 16             | 0         | 58         | 12         | 70          |
| C09                | 1         | 1         | 13            | 8         | 1                | 5         | 7         | 3         | 4         | 3         | 2         | 3         | 17         | 1         | 22             | 12        | 67         | 36         | 103         |
| <b>Total</b>       | <b>28</b> | <b>22</b> | <b>40</b>     | <b>20</b> | <b>11</b>        | <b>15</b> | <b>29</b> | <b>21</b> | <b>30</b> | <b>24</b> | <b>43</b> | <b>19</b> | <b>100</b> | <b>25</b> | <b>106</b>     | <b>36</b> | <b>387</b> | <b>182</b> | <b>569</b>  |
| <b>Grand total</b> | <b>48</b> | <b>37</b> | <b>87</b>     | <b>69</b> | <b>33</b>        | <b>30</b> | <b>67</b> | <b>38</b> | <b>58</b> | <b>58</b> | <b>77</b> | <b>41</b> | <b>163</b> | <b>76</b> | <b>171</b>     | <b>84</b> | <b>704</b> | <b>433</b> | <b>1137</b> |

**Table S2:** Characteristics of CNVs including CNV number, deletion to duplication ratio, average CNV size and percentage of CNVs larger or smaller than average in eight *B. napus* lines.

|                               | Ascona  |       | English Giant |       | HANSEN x GASPARD |       | Milena        |      |
|-------------------------------|---------|-------|---------------|-------|------------------|-------|---------------|------|
|                               | Del     | Dup   | Del           | Dup   | Del              | Dup   | Del           | Dup  |
| CNV number                    | 48      | 37    | 87            | 69    | 33               | 30    | 67            | 38   |
| Deletion to duplication ratio | 1.29    | -     | 1.26          | -     | 1.1              | -     | 1.76          | -    |
| Average CNV size (kb)         | 3.06    | 1.91  | 3.54          | 3.37  | 2.35             | 3.15  | 4.90          | 1.93 |
| Median CNV size (kb)          | 2.10    | 1.75  | 2.30          | 2.92  | 1.62             | 2.82  | 2.81          | 1.94 |
| Larger than average (%)       | 37.5    | 43.24 | 24.14         | 28.99 | 39.39            | 36.67 | 23.88         | 50   |
| Smaller than average (%)      | 62.5    | 56.76 | 75.86         | 71.01 | 60.61            | 63.33 | 76.12         | 50   |
|                               | Pacific |       | Pirola        |       | Tina             |       | Wilhelsburger |      |
|                               | Del     | Dup   | Del           | Dup   | Del              | Dup   | Del           | Dup  |
| CVN number                    | 58      | 58    | 77            | 41    | 163              | 76    | 171           | 84   |
| Deletion to duplication ratio | 1       | -     | 1.87          | -     | 2.14             | -     | 2.03          | -    |
| Average CNV size (kb)         | 2.73    | 2.69  | 3.44          | 2.72  | 3.73             | 2.62  | 4.03          | 2.56 |
| Median CNV size (kb)          | 1.99    | 2.19  | 1.92          | 2.19  | 2.32             | 2.59  | 2.41          | 2.52 |
| Larger than average (%)       | 37.93   | 39.66 | 28.57         | 39.02 | 25.15            | 50    | 22.81         | 50   |
| Smaller than average (%)      | 62.07   | 60.34 | 71.43         | 60.98 | 74.85            | 50    | 77.19         | 50   |

**Table S3:** The number of RGAs affected by CNV events in eight *B. napus* lines.

|              | Ascona    |           | English Giant |           | Hansen × Gaspard |           | Milena    |           | Pacific   |           | Pirola    |           | Tina       |           | Wilhelsburger |           | Sum of Del | Sum of Dup | Total       |
|--------------|-----------|-----------|---------------|-----------|------------------|-----------|-----------|-----------|-----------|-----------|-----------|-----------|------------|-----------|---------------|-----------|------------|------------|-------------|
| RGAs         | Del       | Dup       | Del           | Dup       | Del              | Dup       | Del       | Dup       | Del       | Dup       | Del       | Dup       | Del        | Dup       | Del           | Dup       |            |            |             |
| CN           | 1         | 2         | 5             | 2         | 0                | 0         | 2         | 1         | 1         | 1         | 3         | 0         | 2          | 3         | 7             | 2         | 21         | 11         | 32          |
| CNL          | 5         | 2         | 2             | 3         | 0                | 2         | 5         | 4         | 2         | 3         | 7         | 1         | 10         | 7         | 10            | 6         | 41         | 28         | 69          |
| NBS          | 1         | 0         | 5             | 0         | 1                | 1         | 5         | 1         | 2         | 2         | 3         | 1         | 7          | 1         | 6             | 5         | 30         | 11         | 41          |
| NL           | 6         | 1         | 8             | 2         | 3                | 0         | 8         | 3         | 7         | 7         | 11        | 1         | 12         | 4         | 11            | 5         | 66         | 23         | 89          |
| OTHER        | 0         | 0         | 1             | 1         | 1                | 0         | 1         | 0         | 1         | 0         | 2         | 0         | 1          | 1         | 4             | 0         | 11         | 2          | 13          |
| TN           | 4         | 0         | 2             | 0         | 2                | 0         | 0         | 0         | 2         | 0         | 3         | 0         | 5          | 1         | 5             | 0         | 23         | 1          | 24          |
| TNL          | 1         | 3         | 0             | 1         | 0                | 5         | 7         | 3         | 6         | 4         | 4         | 6         | 16         | 4         | 12            | 0         | 46         | 26         | 72          |
| TX           | 2         | 0         | 1             | 1         | 2                | 0         | 3         | 0         | 2         | 0         | 2         | 1         | 9          | 1         | 9             | 2         | 30         | 5          | 35          |
| <b>Sum</b>   | <b>20</b> | <b>8</b>  | <b>24</b>     | <b>10</b> | <b>9</b>         | <b>8</b>  | <b>31</b> | <b>12</b> | <b>23</b> | <b>17</b> | <b>35</b> | <b>10</b> | <b>62</b>  | <b>22</b> | <b>64</b>     | <b>20</b> | <b>268</b> | <b>107</b> | <b>375</b>  |
| RLK          | 20        | 23        | 48            | 50        | 16               | 18        | 24        | 17        | 27        | 31        | 32        | 23        | 73         | 41        | 79            | 51        | 319        | 254        | 573         |
| RLP          | 8         | 6         | 15            | 9         | 8                | 4         | 12        | 9         | 8         | 10        | 10        | 8         | 28         | 13        | 28            | 13        | 117        | 72         | 189         |
| <b>Sum</b>   | <b>28</b> | <b>29</b> | <b>63</b>     | <b>59</b> | <b>24</b>        | <b>22</b> | <b>36</b> | <b>26</b> | <b>35</b> | <b>41</b> | <b>42</b> | <b>31</b> | <b>101</b> | <b>54</b> | <b>107</b>    | <b>64</b> | <b>436</b> | <b>326</b> | <b>762</b>  |
| <b>Total</b> | <b>48</b> | <b>37</b> | <b>87</b>     | <b>69</b> | <b>33</b>        | <b>30</b> | <b>67</b> | <b>38</b> | <b>58</b> | <b>58</b> | <b>77</b> | <b>41</b> | <b>163</b> | <b>76</b> | <b>171</b>    | <b>84</b> | <b>704</b> | <b>433</b> | <b>1137</b> |

**Table S4:** The number of singletons and clustered RGAs affected by CNV across 563 *R* genes.

| RGAs                         | In cluster |           |           |            | Singleton  |            |           |            | Sum of Del | Sum of Dup | Sum of Both | Total      |
|------------------------------|------------|-----------|-----------|------------|------------|------------|-----------|------------|------------|------------|-------------|------------|
|                              | Del        | Dup       | Both      | Sum        | Del        | Dup        | Both      | Sum        |            |            |             |            |
| CN                           | 5          | 2         | 2         | <b>9</b>   | 2          | 0          | 0         | <b>2</b>   | <b>7</b>   | <b>2</b>   | <b>2</b>    | <b>11</b>  |
| CNL                          | 12         | 7         | 3         | <b>22</b>  | 7          | 3          | 0         | <b>10</b>  | <b>19</b>  | <b>10</b>  | <b>3</b>    | <b>32</b>  |
| NBS                          | 12         | 3         | 2         | <b>17</b>  | 2          | 2          | 0         | <b>4</b>   | <b>14</b>  | <b>5</b>   | <b>2</b>    | <b>21</b>  |
| NL                           | 11         | 4         | 2         | <b>17</b>  | 8          | 4          | 4         | <b>16</b>  | <b>19</b>  | <b>8</b>   | <b>6</b>    | <b>33</b>  |
| OTHER                        | 2          | 1         | 0         | <b>3</b>   | 2          | 1          | 0         | <b>3</b>   | <b>4</b>   | <b>2</b>   | <b>0</b>    | <b>6</b>   |
| TN                           | 9          | 1         | 0         | <b>10</b>  | 1          | 0          | 0         | <b>1</b>   | <b>10</b>  | <b>1</b>   | <b>0</b>    | <b>11</b>  |
| TNL                          | 18         | 8         | 3         | <b>29</b>  | 2          | 0          | 1         | <b>3</b>   | <b>20</b>  | <b>8</b>   | <b>4</b>    | <b>32</b>  |
| TX                           | 10         | 4         | 0         | <b>14</b>  | 3          | 1          | 0         | <b>4</b>   | <b>13</b>  | <b>5</b>   | <b>0</b>    | <b>18</b>  |
| <b>Sum of NBS-LRR and TX</b> | <b>79</b>  | <b>30</b> | <b>12</b> | <b>121</b> | <b>27</b>  | <b>11</b>  | <b>5</b>  | <b>43</b>  | <b>106</b> | <b>41</b>  | <b>17</b>   | <b>164</b> |
| RLK                          | 71         | 31        | 8         | <b>110</b> | 89         | 101        | 19        | <b>209</b> | <b>160</b> | <b>132</b> | <b>27</b>   | <b>319</b> |
| RLP                          | 30         | 14        | 9         | <b>53</b>  | 14         | 9          | 4         | <b>27</b>  | <b>44</b>  | <b>23</b>  | <b>13</b>   | <b>80</b>  |
| <b>Sum of TM-LRR</b>         | <b>101</b> | <b>45</b> | <b>17</b> | <b>163</b> | <b>103</b> | <b>110</b> | <b>23</b> | <b>236</b> | <b>204</b> | <b>155</b> | <b>40</b>   | <b>399</b> |
| <b>Total</b>                 | <b>180</b> | <b>75</b> | <b>29</b> | <b>284</b> | <b>130</b> | <b>121</b> | <b>28</b> | <b>279</b> | <b>310</b> | <b>196</b> | <b>57</b>   | <b>563</b> |

**Table S5:** Distribution and number of the singletons and clustered *R* genes affected by CNV across the chromosomes.

| Chromosome | <i>R</i> genes number | Clustered <i>R</i> genes number | Clusters number | Singleton <i>R</i> genes number | Clustered <i>R</i> genes affected by CNV | Singletons <i>R</i> genes affected by CNV |
|------------|-----------------------|---------------------------------|-----------------|---------------------------------|------------------------------------------|-------------------------------------------|
| A01        | 66                    | 24                              | 11              | 42                              | 6                                        | 16                                        |
| A02        | 75                    | 40                              | 12              | 35                              | 22                                       | 13                                        |
| A03        | 87                    | 28                              | 14              | 59                              | 12                                       | 22                                        |
| A04        | 60                    | 31                              | 13              | 29                              | 8                                        | 5                                         |
| A05        | 52                    | 22                              | 9               | 30                              | 8                                        | 8                                         |
| A06        | 104                   | 50                              | 20              | 54                              | 21                                       | 24                                        |
| A07        | 90                    | 41                              | 17              | 49                              | 12                                       | 8                                         |
| A08        | 85                    | 40                              | 16              | 45                              | 16                                       | 12                                        |
| A09        | 140                   | 63                              | 25              | 77                              | 35                                       | 39                                        |
| A10        | 41                    | 15                              | 6               | 26                              | 1                                        | 4                                         |
| C01        | 107                   | 55                              | 23              | 52                              | 10                                       | 14                                        |
| C02        | 115                   | 58                              | 19              | 57                              | 26                                       | 15                                        |
| C03        | 149                   | 49                              | 19              | 100                             | 21                                       | 27                                        |
| C04        | 83                    | 33                              | 16              | 50                              | 5                                        | 13                                        |
| C05        | 91                    | 34                              | 13              | 57                              | 5                                        | 10                                        |
| C06        | 118                   | 75                              | 24              | 43                              | 29                                       | 7                                         |
| C07        | 75                    | 31                              | 9               | 44                              | 2                                        | 4                                         |
| C08        | 95                    | 53                              | 19              | 42                              | 28                                       | 5                                         |
| C09        | 135                   | 51                              | 21              | 84                              | 17                                       | 33                                        |
| <b>Sum</b> | <b>1,768</b>          | <b>793</b>                      | <b>306</b>      | <b>975</b>                      | <b>284</b>                               | <b>279</b>                                |



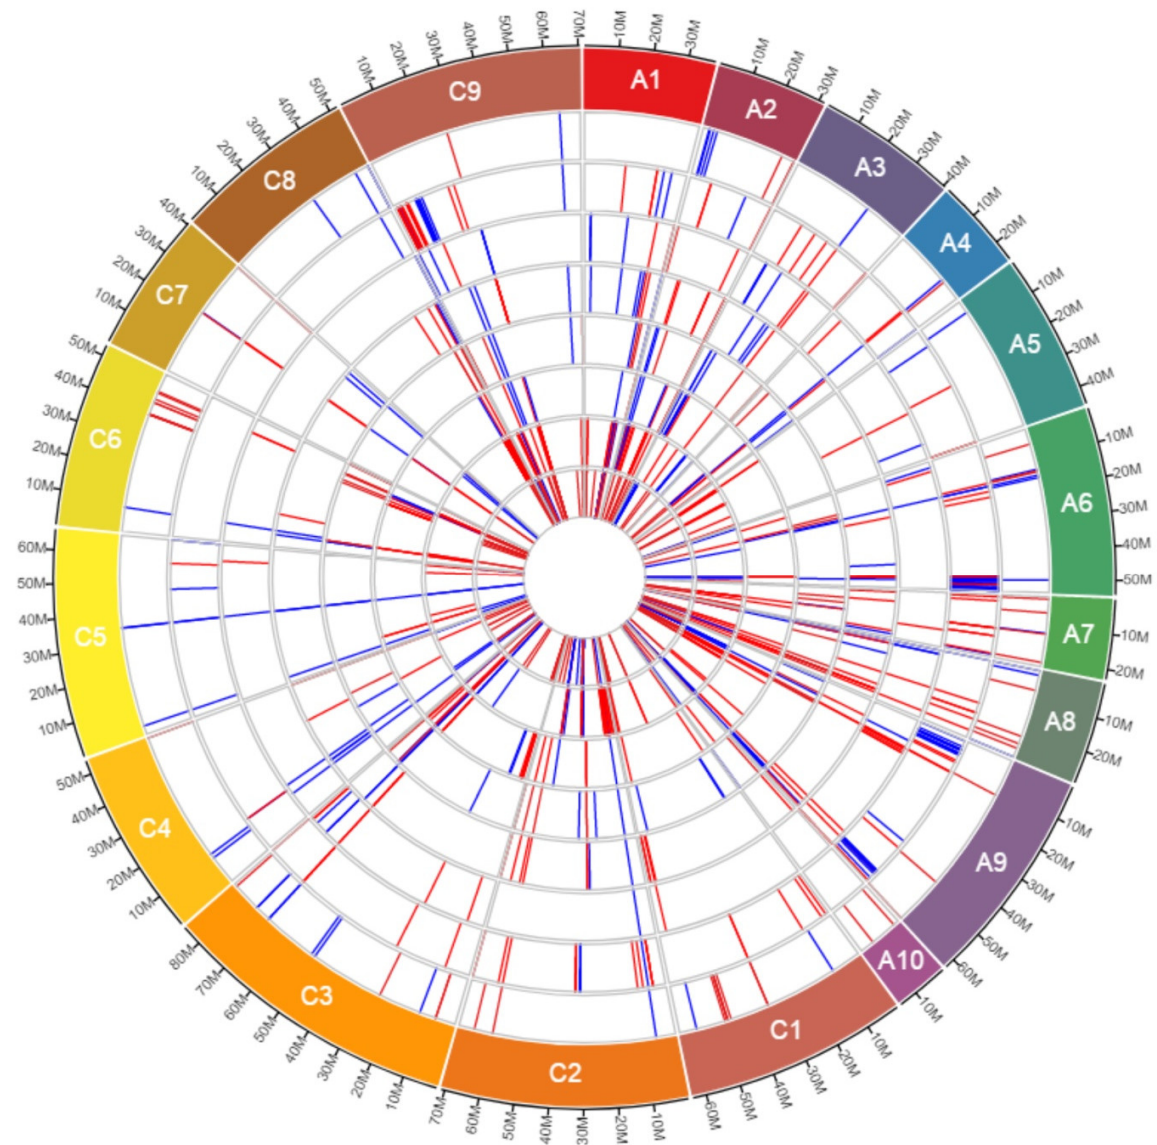

**Figure S1:** The position of CNV events (red and blue lines represents deletions and duplications, respectively) across the chromosomes of eight *B. napus* lines. The tracks from outer to inner show chromosomes, Ascona, English Giant, Hansen × Gaspard, Milena, Pacific, Pirola, Tina and Wilhelsburger.
